# Supplementary material
Source: HighWire-hosted journal article supplement (https://ard.bmj.com/content/82/2/226)
Supplement: inline-supplementary-material-2 [file inline-supplementary-material-2.xlsx]

## Sheet: Table S3
Table S3. loops that strength corrlelation with SLEDAI overlapping differentially expressed genes
chrA	start	end	chrB	start	end	Gene name	The correlation coefficient
1	202140000	202160000	1	202260000	202280000	GPR37L1	-0.779268
1	202140000	202160000	1	202260000	202280000	UBE2T	0.961877
1	202140000	202160000	1	202280000	202300000	GPR37L1	-0.616366
1	202140000	202160000	1	202280000	202300000	UBE2T	0.921346
1	212220000	212240000	1	212460000	212480000	RPL21P28	0.874349
1	218440000	218460000	1	219340000	219360000	LYPLAL1	0.64102
1	218460000	218480000	1	219340000	219360000	LYPLAL1	0.826838
1	218460000	218480000	1	219360000	219380000	LYPLAL1	0.868976
1	218480000	218500000	1	219360000	219380000	LYPLAL1	0.837027
1	218500000	218520000	1	219340000	219360000	LYPLAL1	0.820945
1	22420000	22440000	1	22760000	22780000	WNT4	-0.600417
1	247520000	247540000	1	247640000	247660000	NLRP3	-0.753965
1	247540000	247560000	1	247640000	247660000	NLRP3	-0.747585
1	29540000	29560000	1	31260000	31280000	SDC3	0.721103
1	29560000	29580000	1	31260000	31280000	SDC3	0.653571
1	31640000	31660000	1	32000000	32020000	HCRTR1	-0.787555
1	32020000	32040000	1	32240000	32260000	HCRTR1	-0.716689
1	32100000	32120000	1	32500000	32520000	HCRTR1	-0.611353
1	32120000	32140000	1	32240000	32260000	HCRTR1	-0.738702
1	32120000	32140000	1	32500000	32520000	HCRTR1	-0.628175
1	38340000	38360000	1	39300000	39320000	MYCBP	0.669225
1	38340000	38360000	1	39300000	39320000	GJA9-MYCBP	-0.669196
1	39780000	39800000	1	39900000	39920000	KIAA0754	-0.680536
1	41060000	41080000	1	41300000	41320000	RIMS3	-0.753094
1	41060000	41080000	1	41320000	41340000	RIMS3	-0.702024
1	60440000	60460000	1	62300000	62320000	CYP2J2	0.817882
1	78420000	78440000	1	79100000	79120000	DNAJB4	0.952335
1	78440000	78460000	1	79100000	79120000	DNAJB4	0.949275
1	78580000	78600000	1	79060000	79080000	PTGFR	0.871404
1	78600000	78620000	1	79060000	79080000	PTGFR	0.852502
1	78620000	78640000	1	79040000	79060000	PTGFR	0.906484
1	79060000	79080000	1	79140000	79160000	IFI44L	-0.803496
1	79060000	79080000	1	79140000	79160000	IFI44	-0.734153
1	79060000	79080000	1	79140000	79160000	IFI44L	-0.803496
1	79060000	79080000	1	79140000	79160000	IFI44	-0.734153
1	79060000	79080000	1	79140000	79160000	PTGFR	0.614315
1	9160000	9180000	1	9520000	9540000	SLC2A5	0.906885
1	9180000	9200000	1	9540000	9560000	SLC2A5	0.846885
1	9180000	9200000	1	9620000	9640000	SLC2A5	0.860359
1	9180000	9200000	1	9620000	9640000	TMEM201	-0.634482
1	9180000	9200000	1	9640000	9660000	SLC2A5	0.756501
1	9200000	9220000	1	9540000	9560000	SLC2A5	0.78624
1	156640000	156660000	1	156840000	156860000	PEAR1	0.640354
1	157680000	157700000	1	159080000	159100000	IFI16	0.808553
1	158020000	158040000	1	159080000	159100000	IFI16	-0.662196
1	159180000	159200000	1	159840000	159860000	FCER1A	-0.694589
1	168560000	168580000	1	169300000	169320000	BLZF1	0.780887
1	168560000	168580000	1	169320000	169340000	BLZF1	0.846579
1	168580000	168600000	1	169300000	169320000	BLZF1	0.851156
1	183600000	183620000	1	184000000	184020000	NCF2	-0.864708
1	183620000	183640000	1	183860000	183880000	NCF2	-0.601388
1	183620000	183640000	1	183860000	183880000	APOBEC4	0.758355
1	183620000	183640000	1	183880000	183900000	APOBEC4	0.804481
1	186360000	186380000	1	186940000	186960000	PLA2G4A	0.608123
1	186380000	186400000	1	186940000	186960000	PLA2G4A	0.707016
1	186420000	186440000	1	186940000	186960000	PLA2G4A	0.79538
1	186440000	186460000	1	186940000	186960000	PLA2G4A	0.801539
1	186440000	186460000	1	186960000	186980000	PLA2G4A	0.805534
1	192560000	192580000	1	192980000	193000000	RGS1	0.793663
11	59580000	59600000	11	59940000	59960000	TCN1	0.835885
11	59580000	59600000	11	59940000	59960000	MS4A6A	0.818981
11	104460000	104480000	11	104860000	104880000	CASP5	-0.76013
11	122960000	122980000	11	123320000	123340000	CLMP	-0.630703
2	200820000	200840000	2	201700000	201720000	PPIL3	0.873865
2	200820000	200840000	2	201700000	201720000	BZW1	0.793954
2	202100000	202120000	2	203080000	203100000	SUMO1	0.630148
2	202100000	202120000	2	203140000	203160000	SUMO1	0.645107
2	218640000	218660000	2	218860000	218880000	CXCR2P1	0.74324
2	218640000	218660000	2	218880000	218900000	CXCR2P1	0.75165
2	218640000	218660000	2	218900000	218920000	CXCR2P1	0.661961
12	21620000	21640000	12	21800000	21820000	RECQL	-0.640631
12	21640000	21660000	12	21800000	21820000	RECQL	-0.614452
12	21640000	21660000	12	21820000	21840000	RECQL	-0.608842
12	22260000	22280000	12	22400000	22420000	ST8SIA1	0.862731
12	26240000	26260000	12	27000000	27020000	RASSF8	0.883143
12	26240000	26260000	12	27000000	27020000	FGFR1OP2	0.886446
12	26260000	26280000	12	27000000	27020000	RASSF8	0.835576
12	26260000	26280000	12	27000000	27020000	FGFR1OP2	0.914706
12	29320000	29340000	12	29440000	29460000	ERGIC2	0.799068
2	231960000	231980000	2	232300000	232320000	NMUR1	-0.611752
12	3960000	3980000	12	4760000	4780000	DYRK4	0.617672
12	4100000	4120000	12	4640000	4660000	RAD51AP1	0.825985
12	4100000	4120000	12	4640000	4660000	DYRK4	0.830992
12	4100000	4120000	12	4640000	4660000	C12orf4	0.747715
12	44140000	44160000	12	44260000	44280000	TWF1	-0.864708
12	4420000	4440000	12	4620000	4640000	RAD51AP1	0.707517
12	4420000	4440000	12	4620000	4640000	DYRK4	0.784581
12	4420000	4440000	12	4620000	4640000	C12orf4	0.656666
12	4440000	4460000	12	4620000	4640000	RAD51AP1	0.662896
12	4440000	4460000	12	4620000	4640000	DYRK4	0.730576
12	52520000	52540000	12	53360000	53380000	NR4A1	0.615929
12	57200000	57220000	12	57360000	57380000	PRIM1	-0.702766
2	26160000	26180000	2	26780000	26800000	OTOF	-0.724367
2	26160000	26180000	2	26800000	26820000	OTOF	-0.606902
2	26180000	26200000	2	26780000	26800000	OTOF	-0.650934
12	7380000	7400000	12	7940000	7960000	SLC2A14	0.843174
2	27920000	27940000	2	28660000	28680000	GPN1	0.680472
2	27920000	27940000	2	28660000	28680000	PLB1	0.713208
2	27920000	27940000	2	28680000	28700000	GPN1	0.758188
2	27920000	27940000	2	28680000	28700000	PLB1	0.763133
2	27920000	27940000	2	28760000	28780000	GPN1	0.87322
2	27920000	27940000	2	28760000	28780000	PLB1	0.683755
2	27940000	27960000	2	28660000	28680000	GPN1	0.661134
2	27940000	27960000	2	28660000	28680000	PLB1	0.661605
2	27940000	27960000	2	28680000	28700000	GPN1	0.714585
2	27940000	27960000	2	28680000	28700000	PLB1	0.684534
12	8000000	8020000	12	8140000	8160000	C3AR1	0.644185
12	93880000	93900000	12	94140000	94160000	SOCS2	0.913641
12	93900000	93920000	12	94140000	94160000	SOCS2	0.947146
12	93900000	93920000	12	94140000	94160000	UBE2N	0.64168
12	93920000	93940000	12	94140000	94160000	SOCS2	0.964868
12	93960000	93980000	12	94140000	94160000	SOCS2	0.969008
12	102280000	102300000	12	102520000	102540000	NUP37	0.632993
12	102320000	102340000	12	103160000	103180000	WASHC3	0.685765
12	102320000	102340000	12	103240000	103260000	WASHC3	0.637656
12	109040000	109060000	12	109200000	109220000	CORO1C	-0.60577
12	112260000	112280000	12	112820000	112840000	ALDH2	-0.669831
12	112260000	112280000	12	112840000	112860000	ALDH2	-0.662754
12	112280000	112300000	12	112820000	112840000	ALDH2	-0.725971
12	112300000	112320000	12	112820000	112840000	ALDH2	-0.70451
12	112320000	112340000	12	112820000	112840000	ALDH2	-0.702859
12	113340000	113360000	12	113420000	113440000	DTX1	-0.760757
12	117800000	117820000	12	118260000	118280000	KSR2	0.770884
12	120760000	120780000	12	120860000	120880000	TRIAP1	0.726702
12	120760000	120780000	12	120860000	120880000	COX6A1	0.714779
12	120760000	120780000	12	120860000	120880000	COQ5	0.625512
12	131320000	131340000	12	132520000	132540000	RAN	0.640601
12	131580000	131600000	12	132320000	132340000	ADGRD1	-0.774026
12	13400000	13420000	12	14300000	14320000	EMP1	-0.656718
2	37400000	37420000	2	38100000	38120000	RMDN2	-0.633916
2	40140000	40160000	2	42000000	42020000	SLC8A1-AS1	0.62841
13	43520000	43540000	13	44360000	44380000	EPSTI1	0.67033
13	43540000	43560000	13	44360000	44380000	EPSTI1	0.739462
13	43640000	43660000	13	44360000	44380000	EPSTI1	0.915829
13	44460000	44480000	13	45920000	45940000	TPT1-AS1	-0.929182
13	44460000	44480000	13	45920000	45940000	TPT1	0.795959
13	45040000	45060000	13	45860000	45880000	TPT1	0.646869
14	35600000	35620000	14	36280000	36300000	PPP2R3C	-0.669928
2	63900000	63920000	2	64080000	64100000	MDH1	0.792982
2	63900000	63920000	2	64080000	64100000	UGP2	0.816578
2	63920000	63940000	2	64080000	64100000	UGP2	0.789629
14	50060000	50080000	14	50560000	50580000	LRR1	-0.642475
14	50080000	50100000	14	50560000	50580000	LRR1	-0.682216
14	53020000	53040000	14	53240000	53260000	PSMC6	-0.655955
14	55700000	55720000	14	56920000	56940000	DLGAP5	0.688202
14	66820000	66840000	14	67760000	67780000	PLEK2	0.947104
14	66960000	66980000	14	67760000	67780000	PLEK2	0.725213
14	70240000	70260000	14	71060000	71080000	LOC101928075	-0.669496
14	70340000	70360000	14	71000000	71020000	LOC101928075	-0.679933
14	77300000	77320000	14	77780000	77800000	VASH1	-0.688297
14	96240000	96260000	14	96440000	96460000	C14orf132	-0.644328
14	96760000	96780000	14	96880000	96900000	GSKIP	-0.655912
14	102520000	102540000	14	102760000	102780000	HSP90AA1	0.673474
14	103560000	103580000	14	103740000	103760000	TNFAIP2	0.6187
2	71760000	71780000	2	72800000	72820000	DYSF	0.775011
2	71760000	71780000	2	72820000	72840000	DYSF	0.694292
2	71760000	71780000	2	72960000	72980000	DYSF	-0.68261
2	71760000	71780000	2	72980000	73000000	DYSF	-0.603004
2	71820000	71840000	2	72780000	72800000	DYSF	0.68089
15	49340000	49360000	15	50640000	50660000	COPS2	0.668897
15	50620000	50640000	15	51180000	51200000	HDC	0.753429
15	50620000	50640000	15	51200000	51220000	HDC	0.622928
15	51920000	51940000	15	52060000	52080000	DMXL2	0.654029
15	55940000	55960000	15	56700000	56720000	TEX9	0.621617
2	85840000	85860000	2	86320000	86340000	SFTPB	-0.629958
2	85880000	85900000	2	86320000	86340000	SFTPB	-0.601687
15	79600000	79620000	15	80280000	80300000	ST20-MTHFS	0.625504
15	79640000	79660000	15	80280000	80300000	ST20-MTHFS	0.60104
15	79660000	79680000	15	80280000	80300000	ST20-MTHFS	0.621472
15	79660000	79680000	15	80300000	80320000	BCL2A1	0.611543
15	79660000	79680000	15	80300000	80320000	ZFAND6	0.603872
15	79680000	79700000	15	80280000	80300000	ST20-MTHFS	0.601013
15	86260000	86280000	15	86380000	86400000	KLHL25	0.717501
2	98320000	98340000	2	99000000	99020000	COX5B	0.637094
16	21560000	21580000	16	22680000	22700000	IGSF6	-0.631019
16	55500000	55520000	16	56340000	56360000	LPCAT2	0.837996
16	55500000	55520000	16	56340000	56360000	GNAO1	-0.805667
16	81100000	81120000	16	82180000	82200000	CMC2	-0.7191
17	26260000	26280000	17	26560000	26580000	IFT20	0.601677
17	29320000	29340000	17	29520000	29540000	ADAP2	0.867347
17	29320000	29340000	17	29540000	29560000	ADAP2	0.702789
17	29340000	29360000	17	29520000	29540000	ADAP2	0.867516
17	29340000	29360000	17	29540000	29560000	ADAP2	0.75219
17	32500000	32520000	17	32680000	32700000	CCL2	0.741857
17	32500000	32520000	17	32680000	32700000	CCL8	0.765496
17	32560000	32580000	17	32680000	32700000	CCL2	0.992142
17	32560000	32580000	17	32680000	32700000	CCL8	0.975582
17	32560000	32580000	17	32680000	32700000	CCL8	0.975582
17	40960000	40980000	17	41420000	41440000	AOC2	-0.907701
17	40980000	41000000	17	41420000	41440000	AOC2	-0.866772
17	48600000	48620000	17	49200000	49220000	NME1	0.729231
17	48600000	48620000	17	49200000	49220000	NME1-NME2	0.936279
17	48600000	48620000	17	49200000	49220000	NME2	0.812653
17	55200000	55220000	17	56260000	56280000	MPO	0.640124
17	55320000	55340000	17	55820000	55840000	MRPS23	0.710348
17	55920000	55940000	17	56060000	56080000	MRPS23	0.83247
17	55940000	55960000	17	56060000	56080000	MRPS23	0.822626
17	56380000	56400000	17	56560000	56580000	TEX14	0.626313
17	56380000	56400000	17	56580000	56600000	TEX14	0.635527
17	56380000	56400000	17	57100000	57120000	TSPOAP1	-0.622223
17	6540000	6560000	17	6900000	6920000	ALOX15P1	0.907163
17	6540000	6560000	17	6900000	6920000	MED31	0.928013
17	6580000	6600000	17	7060000	7080000	ALOX15P1	0.608825
17	6800000	6820000	17	7040000	7060000	ALOX12	0.674177
17	76080000	76100000	17	76160000	76180000	TNRC6C	0.751986
17	77060000	77080000	17	77680000	77700000	RBFOX3	-0.887077
17	77080000	77100000	17	77660000	77680000	RBFOX3	-0.912531
17	77080000	77100000	17	77680000	77700000	RBFOX3	-0.912296
17	77100000	77120000	17	77660000	77680000	RBFOX3	-0.795201
17	8280000	8300000	17	8880000	8900000	RPL26	0.781028
17	8280000	8300000	17	8880000	8900000	LOC100128288	-0.632966
17	8300000	8320000	17	8760000	8780000	RPL26	0.80685
17	8300000	8320000	17	8760000	8780000	LOC100128288	-0.798761
17	8300000	8320000	17	8780000	8800000	RPL26	0.875446
17	8300000	8320000	17	8780000	8800000	LOC100128288	-0.817795
17	8300000	8320000	17	8780000	8800000	RNF222	-0.614736
17	8300000	8320000	17	8800000	8820000	RPL26	0.91632
17	8300000	8320000	17	8800000	8820000	LOC100128288	-0.767583
17	8300000	8320000	17	8800000	8820000	RNF222	-0.609008
17	8300000	8320000	17	8880000	8900000	RPL26	0.749575
17	8300000	8320000	17	8900000	8920000	RPL26	0.758393
17	8320000	8340000	17	8780000	8800000	RPL26	0.829014
17	8320000	8340000	17	8780000	8800000	LOC100128288	-0.745856
17	8320000	8340000	17	8880000	8900000	RPL26	0.698046
17	8360000	8380000	17	8900000	8920000	RPL26	0.724015
2	134980000	135000000	2	135160000	135180000	TMEM163	0.6859
18	3260000	3280000	18	3980000	4000000	MYL12B	0.802963
18	3260000	3280000	18	3980000	4000000	MYL12A	0.834941
18	3280000	3300000	18	3980000	4000000	MYL12B	0.838926
18	3280000	3300000	18	3980000	4000000	MYL12A	0.868015
18	4200000	4220000	18	4680000	4700000	DLGAP1-AS5	0.772626
18	57500000	57520000	18	58200000	58220000	PMAIP1	0.711753
18	840000	860000	18	2520000	2540000	NDC80	0.72718
18	860000	880000	18	2520000	2540000	NDC80	0.664155
19	2240000	2260000	19	2600000	2620000	LSM7	0.973806
19	2260000	2280000	19	2600000	2620000	LSM7	0.915378
2	162440000	162460000	2	163140000	163160000	IFIH1	-0.875184
19	35560000	35580000	19	35940000	35960000	FFAR2	-0.620902
19	35560000	35580000	19	35960000	35980000	FFAR2	-0.686474
19	35580000	35600000	19	35960000	35980000	FFAR2	-0.778792
19	35620000	35640000	19	35960000	35980000	FFAR2	-0.706214
19	39600000	39620000	19	39800000	39820000	GMFG	0.615257
19	41840000	41860000	19	42060000	42080000	PCAT19	0.634885
19	45400000	45420000	19	45820000	45840000	PPP1R13L	-0.638609
19	46000000	46020000	19	46140000	46160000	SNRPD2	0.772972
19	46000000	46020000	19	46160000	46180000	SNRPD2	0.684043
19	46020000	46040000	19	46140000	46160000	SNRPD2	0.790109
19	52400000	52420000	19	52540000	52560000	FPR3	-0.645374
19	54600000	54620000	19	54700000	54720000	OSCAR	-0.716756
19	54600000	54620000	19	54700000	54720000	LILRB2	-0.786205
19	54600000	54620000	19	54700000	54720000	LILRB3	-0.617302
19	58240000	58260000	19	58660000	58680000	ZNF154	0.62417
2	165860000	165880000	2	166720000	166740000	SCN3A	0.722827
2	170320000	170340000	2	170400000	170420000	FASTKD1	-0.957584
2	170320000	170340000	2	170420000	170440000	FASTKD1	-0.99253
19	10820000	10840000	19	10960000	10980000	C19orf38	-0.65017
2	173880000	173900000	2	175180000	175200000	CIR1	0.731553
2	173880000	173900000	2	175200000	175220000	CIR1	0.740855
2	173900000	173920000	2	175200000	175220000	CIR1	0.722024
2	175180000	175200000	2	176940000	176960000	CIR1	0.893996
2	175180000	175200000	2	176960000	176980000	CIR1	0.955412
2	175180000	175200000	2	177020000	177040000	CIR1	0.992251
2	175200000	175220000	2	176940000	176960000	CIR1	0.898858
2	175200000	175220000	2	176960000	176980000	CIR1	0.944655
2	175200000	175220000	2	177000000	177020000	CIR1	0.987117
19	19640000	19660000	19	19740000	19760000	NDUFA13	-0.604414
20	36180000	36200000	20	36840000	36860000	TGM2	0.754061
20	36200000	36220000	20	36820000	36840000	TGM2	0.671647
20	36680000	36700000	20	36840000	36860000	TGM2	0.70029
20	36680000	36700000	20	36840000	36860000	TGM2	0.70029
20	46280000	46300000	20	47220000	47240000	PREX1	-0.697465
20	46280000	46300000	20	47240000	47260000	PREX1	-0.697347
20	46280000	46300000	20	47520000	47540000	PREX1	-0.659771
20	46300000	46320000	20	47220000	47240000	PREX1	-0.699319
20	46320000	46340000	20	47500000	47520000	PREX1	-0.748814
20	46340000	46360000	20	47220000	47240000	PREX1	-0.810764
20	46360000	46380000	20	47220000	47240000	PREX1	-0.718665
20	58520000	58540000	20	59820000	59840000	CDH4	-0.628476
2	190320000	190340000	2	190460000	190480000	ASNSD1	-0.703529
21	42640000	42660000	21	43520000	43540000	ABCG1	-0.759558
21	42660000	42680000	21	43520000	43540000	ABCG1	-0.754948
21	44340000	44360000	21	44920000	44940000	SIK1	0.612998
22	31020000	31040000	22	31140000	31160000	TCN2	0.768629
3	23920000	23940000	3	24260000	24280000	UBE2E1	-0.955298
23	23700000	23720000	23	23900000	23920000	APOO	0.613549
23	23700000	23720000	23	23920000	23940000	APOO	0.698751
23	23700000	23720000	23	24040000	24060000	PRDX4	0.603143
23	23720000	23740000	23	24040000	24060000	SAT1	0.807541
23	23780000	23800000	23	23900000	23920000	SAT1	0.709783
23	23780000	23800000	23	23900000	23920000	APOO	0.747394
23	23780000	23800000	23	23900000	23920000	APOO	0.747394
23	23780000	23800000	23	24060000	24080000	SAT1	0.60984
23	23780000	23800000	23	24060000	24080000	APOO	0.701899
23	83560000	83580000	23	83800000	83820000	HDX	0.782758
3	48760000	48780000	3	48980000	49000000	SLC25A20	-0.777776
23	99760000	99780000	23	100020000	100040000	SYTL4	-0.760358
3	50360000	50380000	3	50640000	50660000	ZMYND10	-0.827729
3	50380000	50400000	3	51400000	51420000	ZMYND10	-0.80543
3	50380000	50400000	3	51420000	51440000	ZMYND10	-0.828543
23	108720000	108740000	23	109080000	109100000	NXT2	0.630531
23	12820000	12840000	23	12900000	12920000	TLR7	0.693037
23	12820000	12840000	23	12900000	12920000	TLR7	0.693037
23	12820000	12840000	23	12900000	12920000	TLR8	0.857339
23	12820000	12840000	23	12900000	12920000	TMSB4X	0.698048
23	133600000	133620000	23	133900000	133920000	PHF6	0.740845
23	133600000	133620000	23	133920000	133940000	PHF6	0.693355
23	133620000	133640000	23	133880000	133900000	PHF6	0.693749
23	133620000	133640000	23	133900000	133920000	PHF6	0.737613
3	63320000	63340000	3	63780000	63800000	THOC7	-0.941203
3	63320000	63340000	3	63800000	63820000	THOC7	-0.834717
3	69180000	69200000	3	69720000	69740000	UBA3	0.912753
3	69180000	69200000	3	69720000	69740000	ARL6IP5	0.899398
3	69180000	69200000	3	69720000	69740000	MITF	0.754927
3	100040000	100060000	3	100300000	100320000	TBC1D23	0.620641
3	100420000	100440000	3	101380000	101400000	RPL24	0.810635
3	100440000	100460000	3	101360000	101380000	TRMT10C	0.681042
3	100440000	100460000	3	101360000	101380000	RPL24	0.831123
3	101100000	101120000	3	101280000	101300000	TRMT10C	-0.763345
3	122120000	122140000	3	122240000	122260000	PARP9	-0.683658
3	122120000	122140000	3	122260000	122280000	PARP9	-0.764333
3	122140000	122160000	3	122220000	122240000	PARP9	-0.744392
3	122140000	122160000	3	122240000	122260000	PARP9	-0.70125
3	124460000	124480000	3	125300000	125320000	ITGB5	0.683881
3	138140000	138160000	3	138620000	138640000	CEP70	0.607138
3	179340000	179360000	3	180320000	180340000	ACTL6A	0.65819
3	192480000	192500000	3	192880000	192900000	HRASLS	0.901099
3	192500000	192520000	3	193280000	193300000	MB21D2	0.83771
3	192520000	192540000	3	192680000	192700000	MB21D2	0.86656
3	192520000	192540000	3	192740000	192760000	MB21D2	0.675003
3	192520000	192540000	3	192760000	192780000	MB21D2	0.72324
3	192520000	192540000	3	193280000	193300000	MB21D2	0.808905
3	192540000	192560000	3	192620000	192640000	MB21D2	0.803727
3	192540000	192560000	3	192760000	192780000	MB21D2	0.804909
4	4480000	4500000	4	5800000	5820000	CRMP1	-0.707467
4	78300000	78320000	4	78520000	78540000	CXCL13	0.93393
4	78320000	78340000	4	78500000	78520000	CXCL13	0.923148
4	89280000	89300000	4	89420000	89440000	PYURF	0.744708
4	89280000	89300000	4	89420000	89440000	PIGY	0.744708
4	89300000	89320000	4	89380000	89400000	PYURF	0.801153
4	89300000	89320000	4	89380000	89400000	PIGY	0.801153
4	89300000	89320000	4	89400000	89420000	PYURF	0.826172
4	89300000	89320000	4	89400000	89420000	PIGY	0.826172
4	89340000	89360000	4	89940000	89960000	FAM13A	0.849756
4	89440000	89460000	4	89580000	89600000	PYURF	0.6958
4	89440000	89460000	4	89580000	89600000	PIGY	0.6958
4	89440000	89460000	4	89580000	89600000	FAM13A	0.711254
4	89460000	89480000	4	89560000	89580000	PYURF	0.6078
4	89460000	89480000	4	89560000	89580000	PIGY	0.6078
4	89460000	89480000	4	89560000	89580000	FAM13A	0.610775
4	89460000	89480000	4	89580000	89600000	PYURF	0.646157
4	89460000	89480000	4	89580000	89600000	PIGY	0.646157
4	89460000	89480000	4	89580000	89600000	FAM13A	0.67823
4	89720000	89740000	4	89940000	89960000	FAM13A	0.927945
4	89740000	89760000	4	89920000	89940000	FAM13A	0.942622
4	89740000	89760000	4	89940000	89960000	FAM13A	0.935126
4	109540000	109560000	4	110740000	110760000	RPL34	0.699854
4	109540000	109560000	4	110740000	110760000	EGF	0.688807
4	122380000	122400000	4	122640000	122660000	EXOSC9	0.677969
4	169400000	169420000	4	169920000	169940000	DDX60L	0.605542
4	169420000	169440000	4	169820000	169840000	DDX60L	0.790199
5	39580000	39600000	5	40700000	40720000	TTC33	0.663211
5	39580000	39600000	5	40720000	40740000	TTC33	0.605433
5	8320000	8340000	5	9000000	9020000	SEMA5A	-0.783445
5	90220000	90240000	5	90680000	90700000	ARRDC3	0.718905
5	90240000	90260000	5	90700000	90720000	ARRDC3	0.731091
5	90380000	90400000	5	90700000	90720000	ARRDC3	0.705331
5	90380000	90400000	5	90720000	90740000	ARRDC3	0.639806
5	90400000	90420000	5	90700000	90720000	ARRDC3	0.627024
5	115180000	115200000	5	115400000	115420000	COMMD10	0.612578
5	140180000	140200000	5	140780000	140800000	PCDHGA6	0.704485
5	140180000	140200000	5	140780000	140800000	PCDHGA11	0.657866
5	140200000	140220000	5	140760000	140780000	PCDHGA6	0.622087
5	140200000	140220000	5	140760000	140780000	PCDHGA11	0.657556
5	155000000	155020000	5	156360000	156380000	TIMD4	-0.69037
5	170800000	170820000	5	172380000	172400000	NPM1	0.76403
5	170800000	170820000	5	172380000	172400000	RPL26L1	0.716648
5	170820000	170840000	5	172180000	172200000	NPM1	0.665307
5	170820000	170840000	5	172180000	172200000	DUSP1	0.815088
6	26180000	26200000	6	27780000	27800000	HIST1H2AD	0.706537
6	26180000	26200000	6	27780000	27800000	HIST1H4E	0.698365
6	26180000	26200000	6	27780000	27800000	HIST1H2AL	0.668038
6	28800000	28820000	6	29560000	29580000	ZFP57	-0.77031
6	28920000	28940000	6	29580000	29600000	ZFP57	-0.773078
6	29000000	29020000	6	29520000	29540000	ZNF311	0.616873
6	32360000	32380000	6	32760000	32780000	HLA-DOB	0.752041
6	32380000	32400000	6	32760000	32780000	HLA-DOB	0.776487
6	34480000	34500000	6	35100000	35120000	PACSIN1	-0.632544
6	39120000	39140000	6	39260000	39280000	KCNK5	0.800678
6	75980000	76000000	6	76220000	76240000	COX7A2	0.751043
6	75980000	76000000	6	76240000	76260000	COX7A2	0.702507
6	75980000	76000000	6	76260000	76280000	COX7A2	0.6122
6	76000000	76020000	6	76220000	76240000	COX7A2	0.73451
6	11620000	11640000	6	12480000	12500000	TMEM170B	0.708959
6	124120000	124140000	6	125440000	125460000	RNF217	0.779185
6	126300000	126320000	6	127580000	127600000	ECHDC1	0.745454
6	126320000	126340000	6	127580000	127600000	ECHDC1	0.806088
6	127600000	127620000	6	127840000	127860000	ECHDC1	0.721644
6	127620000	127640000	6	127840000	127860000	ECHDC1	0.730237
7	22760000	22780000	7	23080000	23100000	TOMM7	0.679368
7	22760000	22780000	7	23080000	23100000	FAM126A	0.731087
7	22780000	22800000	7	23080000	23100000	TOMM7	0.637467
7	22780000	22800000	7	23080000	23100000	FAM126A	0.646014
7	92720000	92740000	7	92840000	92860000	VPS50	0.795574
7	92740000	92760000	7	92840000	92860000	VPS50	0.774365
7	116480000	116500000	7	117820000	117840000	CAPZA2	-0.671786
7	140340000	140360000	7	141240000	141260000	NDUFB2	0.692695
7	140380000	140400000	7	141240000	141260000	NDUFB2	0.676377
7	140400000	140420000	7	141240000	141260000	NDUFB2	0.716115
7	140620000	140640000	7	141240000	141260000	MRPS33	0.843842
7	140720000	140740000	7	141240000	141260000	MRPS33	0.791206
7	140720000	140740000	7	141400000	141420000	MRPS33	0.772086
7	140720000	140740000	7	141440000	141460000	MRPS33	0.84703
7	140740000	140760000	7	141220000	141240000	MRPS33	0.606489
7	140740000	140760000	7	141240000	141260000	MRPS33	0.702003
7	150020000	150040000	7	150460000	150480000	GIMAP2	-0.620833
7	150020000	150040000	7	150460000	150480000	TMEM176A	-0.699785
7	150020000	150040000	7	150460000	150480000	TMEM176B	-0.614628
8	22260000	22280000	8	22600000	22620000	EGR3	-0.818226
8	22460000	22480000	8	22600000	22620000	EGR3	-0.899597
8	22460000	22480000	8	22600000	22620000	EGR3	-0.899597
8	22480000	22500000	8	22600000	22620000	EGR3	-0.932311
8	22480000	22500000	8	22600000	22620000	EGR3	-0.932311
8	22520000	22540000	8	22600000	22620000	EGR3	-0.919733
8	22520000	22540000	8	22600000	22620000	EGR3	-0.919733
8	37020000	37040000	8	37540000	37560000	ZNF703	-0.730853
8	37020000	37040000	8	37560000	37580000	ZNF703	-0.690748
8	37060000	37080000	8	37540000	37560000	ZNF703	-0.735767
8	37600000	37620000	8	37940000	37960000	LSM1	0.653966
8	37600000	37620000	8	37960000	37980000	ZNF703	-0.674876
8	75280000	75300000	8	75740000	75760000	MIR2052HG	-0.720147
8	107740000	107760000	8	109460000	109480000	OXR1	0.688133
8	107740000	107760000	8	109460000	109480000	EMC2	0.760313
8	11260000	11280000	8	11800000	11820000	SLC35G5	-0.729696
8	17460000	17480000	8	17920000	17940000	ASAH1	-0.641989
8	17460000	17480000	8	17940000	17960000	ASAH1	-0.616316
8	17780000	17800000	8	17920000	17940000	ASAH1	-0.781875
8	17780000	17800000	8	17940000	17960000	ASAH1	-0.707856
8	18040000	18060000	8	18640000	18660000	NAT1	0.602735
8	18060000	18080000	8	18640000	18660000	NAT1	0.627321
9	32540000	32560000	9	33000000	33020000	TOPORS-AS1	0.618236
9	35780000	35800000	9	36020000	36040000	TMEM8B	0.632613
9	75700000	75720000	9	75780000	75800000	ANXA1	-0.786976
9	112320000	112340000	9	112960000	112980000	TXN	0.624346
9	112320000	112340000	9	112980000	113000000	TXN	0.609645
9	117120000	117140000	9	117260000	117280000	ATP6V1G1	-0.705848
9	127520000	127540000	9	127640000	127660000	RPL35	0.763664
9	133320000	133340000	9	133540000	133560000	ASS1	0.88333
9	133340000	133360000	9	133540000	133560000	ASS1	0.911166
9	135280000	135300000	9	135660000	135680000	SPACA9	-0.624105
10	44180000	44200000	10	44520000	44540000	ZNF32	-0.735542
10	44200000	44220000	10	44500000	44520000	ZNF32	-0.699896
10	79780000	79800000	10	80800000	80820000	RPS24	0.679183
10	79780000	79800000	10	80820000	80840000	RPS24	0.682569
10	79780000	79800000	10	80840000	80860000	RPS24	0.683201
10	79780000	79800000	10	80960000	80980000	RPS24	0.706237
10	79800000	79820000	10	80060000	80080000	RPS24	0.73652
10	79800000	79820000	10	80820000	80840000	RPS24	0.634707
10	79800000	79820000	10	80940000	80960000	RPS24	0.692825
10	79800000	79820000	10	80960000	80980000	RPS24	0.709341
10	8080000	8100000	10	8360000	8380000	GATA3	0.668456
10	8100000	8120000	10	8360000	8380000	GATA3	0.730501
10	90760000	90780000	10	90960000	90980000	LIPA	0.632371
10	90780000	90800000	10	90960000	90980000	LIPA	0.660433
10	91020000	91040000	10	91140000	91160000	LIPA	0.771382
10	91020000	91040000	10	91140000	91160000	IFIT1B	0.9659
10	91040000	91060000	10	91140000	91160000	IFIT1B	0.980431
10	91040000	91060000	10	91140000	91160000	LIPA	0.793479
10	91040000	91060000	10	91140000	91160000	IFIT1B	0.980431
10	91080000	91100000	10	91160000	91180000	IFIT1B	0.985773
10	91080000	91100000	10	91160000	91180000	LIPA	0.794684
10	91080000	91100000	10	91160000	91180000	IFIT1B	0.985773
10	91160000	91180000	10	91320000	91340000	IFIT1B	0.985511
10	91200000	91220000	10	91320000	91340000	IFIT1B	0.762799
10	94340000	94360000	10	94600000	94620000	EXOC6	0.76636
10	99040000	99060000	10	99120000	99140000	ARHGAP19-SLIT1	0.667849
10	99040000	99060000	10	99120000	99140000	ARHGAP19-SLIT1	0.667849
10	114220000	114240000	10	114860000	114880000	TCF7L2	0.667188
10	132000000	132020000	10	133600000	133620000	GLRX3	0.778224
